# Supplementary material for: Traits Contributing to the Autistic Spectrum
Source: PLoS One. 2010 Sep 8;5(9):e12633. doi: 10.1371/journal.pone.0012633 (PMC2935882; doi:10.1371/journal.pone.0012633)
Supplement: Table S3 — Maximum and estimated communalities for individual measures using different data sets. (0.19 MB DOC) [file pone.0012633.s007.doc]

Table S3: Maximum (M) and estimated (E) communalities for individual measures using different data sets

| Age | Trait | Standard | | Pairwise | | Complete | | Low IQ | | High IQ | | Single | |
| --- | --- | --- | --- | --- | --- | --- | --- | --- | --- | --- | --- | --- | --- |
|  |  | M | E | M | E | M | E | M | E | M | E | M | E |
| 6m | DDST – Communication | 0.19 | 0.14 | 0.17 | 0.12 | 0.16 | 0.11 | 0.20 | 0.12 | 0.20 | 0.12 |  |  |
|  | Pretend play | 0.16 | 0.09 | 0.14 | 0.07 | 0.16 | 0.08 | 0.24 | 0.13 | 0.19 | 0.10 |  |  |
| 15m | CDI – understand score | 0.48 | 0.40 | 0.45 | 0.38 | 0.47 | 0.37 | 0.49 | 0.39 | 0.47 | 0.38 | 0.47 | 0.47 |
|  | CDI – Vocabulary | 0.65 | 0.62 | 0.62 | 0.59 | 0.66 | 0.61 | 0.66 | 0.60 | 0.67 | 0.64 | 0.65 | 0.66 |
|  | CDI – response to language | 0.12 | 0.07 | 0.10 | 0.06 | 0.10 | 0.04 | 0.14 | 0.06 | 0.13 | 0.05 | 0.10 | 0.09 |
|  | CDI – imitates words | 0.38 | 0.34 | 0.35 | 0.32 | 0.37 | 0.31 | 0.38 | 0.33 | 0.40 | 0.34 | 0.37 | 0.35 |
|  | CDI – gestures | 0.43 | 0.39 | 0.40 | 0.36 | 0.38 | 0.33 | 0.45 | 0.38 | 0.36 | 0.31 | 0.42 | 0.45 |
|  | CDI – objects | 0.49 | 0.45 | 0.46 | 0.42 | 0.47 | 0.40 | 0.52 | 0.43 | 0.45 | 0.40 | 0.47 | 0.49 |
| 18m | DDST – communication | 0.62 | 0.62 | 0.58 | 0.59 | 0.61 | 0.60 | 0.61 | 0.60 | 0.62 | 0.60 | 0.62 | 0.64 |
|  | Pretend play | 0.22 | 0.18 | 0.19 | 0.16 | 0.17 | 0.13 | 0.27 | 0.19 | 0.18 | 0.14 |  |  |
| 24m | CDI – Vocabulary | 0.82 | 0.78 | 0.79 | 0.75 | 0.81 | 0.76 | 0.83 | 0.77 | 0.79 | 0.76 | 0.81 | 0.82 |
|  | CDI – grammar (regular) | 0.69 | 0.61 | 0.66 | 0.58 | 0.66 | 0.56 | 0.68 | 0.59 | 0.67 | 0.58 | 0.67 | 0.70 |
|  | CDI – grammar (irregular) | 0.72 | 0.62 | 0.69 | 0.58 | 0.69 | 0.59 | 0.73 | 0.62 | 0.69 | 0.61 | 0.70 | 0.67 |
|  | CDI – combines words | 0.59 | 0.51 | 0.55 | 0.47 | 0.55 | 0.45 | 0.59 | 0.47 | 0.52 | 0.40 | 0.57 | 0.55 |
| 30m | Pretend play | 0.50 | 0.32 | 0.43 | 0.28 | 0.47 | 0.27 | 0.52 | 0.32 | 0.48 | 0.27 |  |  |
| 38m | CDI – Vocabulary | 0.68 | 0.55 | 0.64 | 0.53 | 0.62 | 0.52 | 0.69 | 0.57 | 0.45 | 0.38 |  |  |
|  | CDI – grammar (regular) | 0.61 | 0.54 | 0.55 | 0.50 | 0.53 | 0.48 | 0.64 | 0.56 | 0.46 | 0.45 |  |  |
|  | CDI – grammar (irregular) | 0.59 | 0.43 | 0.56 | 0.40 | 0.54 | 0.38 | 0.64 | 0.47 | 0.47 | 0.36 |  |  |
|  | CDI – complexity | 0.55 | 0.48 | 0.49 | 0.43 | 0.45 | 0.39 | 0.56 | 0.49 | 0.38 | 0.33 |  |  |
|  | CDI – combines words | 0.60 | 0.57 | 0.53 | 0.50 | 0.40 | 0.33 | 0.55 | 0.51 | 0.25 | 0.21 |  |  |
|  | Communication | 0.54 | 0.51 | 0.47 | 0.44 | 0.43 | 0.39 | 0.55 | 0.49 | 0.34 | 0.30 |  |  |
|  | Intelligibility | 0.44 | 0.40 | 0.36 | 0.33 | 0.39 | 0.33 | 0.51 | 0.46 | 0.30 | 0.26 |  |  |
| 42m | Pretend play | 0.52 | 0.34 | 0.45 | 0.30 | 0.46 | 0.27 | 0.56 | 0.37 | 0.47 | 0.26 | 0.29 | 0.29 |
| 57m | Communication | 0.77 | 0.74 | 0.65 | 0.59 | 0.57 | 0.55 | 0.74 | 0.69 | 0.42 | 0.37 | 0.66 | 0.69 |
|  | Musical | 0.50 | 0.37 | 0.42 | 0.28 | 0.38 | 0.24 | 0.53 | 0.38 | 0.40 | 0.29 | 0.38 | 0.35 |
|  | Intelligibility | 0.17 | 0.14 | 0.13 | 0.10 | 0.11 | 0.07 | 0.23 | 0.18 | 0.13 | 0.06 | 0.12 | 0.13 |
|  | Combines words | 0.64 | 0.59 | 0.53 | 0.48 | 0.27 | 0.20 | 0.58 | 0.47 | 0.22 | 0.12 | 0.49 | 0.50 |
| 69m | Communication | 0.80 | 0.75 | 0.68 | 0.60 | 0.63 | 0.59 | 0.76 | 0.68 | 0.38 | 0.28 |  |  |
|  | Musical | 0.55 | 0.38 | 0.46 | 0.29 | 0.44 | 0.26 | 0.57 | 0.37 | 0.42 | 0.23 |  |  |
|  | Intelligibility | 0.13 | 0.08 | 0.09 | 0.05 | 0.09 | 0.04 | 0.17 | 0.10 | 0.11 | 0.02 |  |  |
|  | Combines words | 0.66 | 0.59 | 0.55 | 0.47 | 0.23 | 0.16 | 0.55 | 0.42 | 0.16 | 0.07 |  |  |
| 81m | Communication | 0.79 | 0.74 | 0.66 | 0.56 | 0.56 | 0.49 | 0.72 | 0.63 | 0.27 | 0.19 |  |  |
|  | Musical | 0.51 | 0.35 | 0.41 | 0.25 | 0.37 | 0.21 | 0.52 | 0.34 | 0.35 | 0.18 |  |  |
|  | Intelligibility | 0.12 | 0.08 | 0.08 | 0.05 | 0.10 | 0.04 | 0.18 | 0.10 | 0.10 | 0.03 |  |  |
|  | Combines words | 0.55 | 0.49 | 0.38 | 0.30 | 0.22 | 0.15 | 0.47 | 0.36 | 0.09 | 0.02 |  |  |
| 9y | CCC – intelligibility & fluency | 0.63 | 0.59 | 0.50 | 0.42 | 0.43 | 0.36 | 0.65 | 0.55 | 0.33 | 0.24 | 0.61 | 0.65 |
|  | CCC – syntax score | 0.67 | 0.63 | 0.48 | 0.41 | 0.31 | 0.24 | 0.59 | 0.47 | 0.17 | 0.08 | 0.61 | 0.64 |
|  | CCC – coherence | 0.68 | 0.62 | 0.57 | 0.49 | 0.50 | 0.40 | 0.68 | 0.56 | 0.37 | 0.27 | 0.66 | 0.68 |
| 42m | Rutter Prosocial | 0.51 | 0.47 | 0.45 | 0.40 | 0.44 | 0.38 | 0.54 | 0.46 | 0.48 | 0.43 |  |  |
| 47m | SDQ Prosocial | 0.50 | 0.45 | 0.43 | 0.38 | 0.46 | 0.39 | 0.52 | 0.43 | 0.47 | 0.37 |  |  |
| 57m | Empathy | 0.48 | 0.44 | 0.41 | 0.36 | 0.39 | 0.31 | 0.54 | 0.46 | 0.41 | 0.35 |  |  |
| 69m | Empathy | 0.54 | 0.48 | 0.45 | 0.40 | 0.44 | 0.38 | 0.58 | 0.51 | 0.42 | 0.34 |  |  |
| 81m | Empathy | 0.55 | 0.50 | 0.47 | 0.42 | 0.44 | 0.39 | 0.59 | 0.49 | 0.47 | 0.41 | 0.42 | 0.41 |
|  | SDQ Prosocial | 0.61 | 0.60 | 0.52 | 0.51 | 0.53 | 0.50 | 0.60 | 0.56 | 0.59 | 0.55 | 0.39 | 0.40 |
| 91m | SCDC | 0.55 | 0.53 | 0.44 | 0.44 | 0.39 | 0.37 | 0.56 | 0.52 | 0.42 | 0.38 | 0.52 | 0.54 |
| 97m | SDQ Prosocial | 0.61 | 0.59 | 0.50 | 0.48 | 0.54 | 0.51 | 0.60 | 0.54 | 0.60 | 0.56 |  |  |
| 9y | SDQ Prosocial | 0.57 | 0.55 | 0.47 | 0.46 | 0.49 | 0.45 | 0.59 | 0.55 | 0.54 | 0.50 |  |  |
|  | CCC – conversational rapport | 0.57 | 0.51 | 0.46 | 0.40 | 0.43 | 0.35 | 0.55 | 0.47 | 0.44 | 0.36 | 0.54 | 0.56 |
| 38m | Echoes what said | 0.24 | 0.21 | 0.19 | 0.16 | 0.22 | 0.18 | 0.26 | 0.21 | 0.22 | 0.16 |  |  |
| 57m | Echoes what said | 0.37 | 0.30 | 0.28 | 0.21 | 0.31 | 0.21 | 0.38 | 0.32 | 0.29 | 0.18 |  |  |
| 69m | Echoes what said | 0.41 | 0.33 | 0.30 | 0.22 | 0.26 | 0.18 | 0.41 | 0.36 | 0.33 | 0.21 |  |  |
| 81m | Echoes what said | 0.35 | 0.30 | 0.26 | 0.21 | 0.25 | 0.19 | 0.36 | 0.32 | 0.25 | 0.14 | 0.23 | 0.21 |
|  | Nonverbal communication | 0.20 | 0.18 | 0.13 | 0.12 | 0.15 | 0.10 | 0.21 | 0.14 | 0.15 | 0.10 | 0.18 | 0.19 |
| 8y | WOLD – comprehension | 0.34 | 0.23 | 0.26 | 0.18 | 0.27 | 0.15 | 0.24 | 0.07 | 0.17 | 0.05 | 0.32 | 0.36 |
|  | WOLD – oral expression | 0.50 | 0.43 | 0.37 | 0.30 | 0.39 | 0.27 | 0.28 | 0.14 | 0.18 | 0.10 | 0.48 | 0.54 |
|  | Nonword repetition | 0.42 | 0.37 | 0.28 | 0.24 | 0.27 | 0.20 | 0.29 | 0.21 | 0.21 | 0.14 | 0.40 | 0.42 |
|  | WISC – verbal IQ | 0.57 | 0.51 | 0.44 | 0.39 | 0.46 | 0.35 | 0.31 | 0.18 | 0.23 | 0.11 | 0.56 | 0.64 |
|  | DANVA – faces | 0.20 | 0.13 | 0.10 | 0.06 | 0.11 | 0.05 | 0.16 | 0.06 | 0.12 | 0.04 | 0.17 | 0.15 |
| 9y | CCC – inappropriate initiation | 0.44 | 0.37 | 0.37 | 0.29 | 0.37 | 0.26 | 0.49 | 0.38 | 0.36 | 0.26 | 0.42 | 0.50 |
|  | CCC – stereotyped conversation | 0.49 | 0.42 | 0.42 | 0.33 | 0.39 | 0.26 | 0.51 | 0.42 | 0.38 | 0.30 | 0.47 | 0.51 |
|  | CCC – conversational context | 0.64 | 0.59 | 0.55 | 0.49 | 0.48 | 0.38 | 0.64 | 0.56 | 0.43 | 0.36 | 0.63 | 0.67 |
| 18m | Repetitive behaviour | 0.18 | 0.14 | 0.13 | 0.09 | 0.12 | 0.06 | 0.21 | 0.13 | 0.14 | 0.06 |  |  |
| 30m | Repetitive behaviour | 0.29 | 0.22 | 0.23 | 0.14 | 0.20 | 0.10 | 0.33 | 0.23 | 0.16 | 0.03 |  |  |
| 42m | Repetitive behaviour | 0.32 | 0.26 | 0.26 | 0.19 | 0.24 | 0.15 | 0.34 | 0.25 | 0.14 | 0.03 |  |  |
| 57m | Repetitive behaviour | 0.39 | 0.35 | 0.32 | 0.24 | 0.28 | 0.18 | 0.36 | 0.31 | 0.24 | 0.10 |  |  |
| 69m | Repetitive behaviour | 0.41 | 0.39 | 0.33 | 0.26 | 0.22 | 0.14 | 0.44 | 0.38 | 0.22 | 0.09 |  |  |
| 77m | Repetitive behaviour | 0.37 | 0.35 | 0.28 | 0.23 | 0.23 | 0.14 | 0.48 | 0.41 | 0.25 | 0.13 | 0.23 | 0.18 |
| 91m | DAWBA – Number compulsions | 0.93 | 0.53 | 0.92 | 0.64 | 0.91 | 0.74 | 0.95 | 0.59 | 0.90 | 0.81 | 0.93 | 0.93 |
|  | DAWBA – Compulsions score | 0.93 | 0.59 | 0.92 | 0.69 | 0.91 | 0.79 | 0.95 | 0.64 | 0.90 | 0.83 | 0.93 | 0.95 |
|  | DAWBA – Tics or twitches | 0.13 | 0.09 | 0.09 | 0.06 | 0.11 | 0.05 | 0.21 | 0.12 | 0.16 | 0.07 | 0.11 | 0.06 |
| 38m | Stumbles on words | 0.19 | 0.13 | 0.16 | 0.11 | 0.19 | 0.12 | 0.20 | 0.14 | 0.22 | 0.13 |  |  |
|  | Prefers gestures | 0.33 | 0.27 | 0.27 | 0.22 | 0.26 | 0.20 | 0.38 | 0.28 | 0.23 | 0.16 |  |  |
| 57m | Stumbles on words | 0.38 | 0.28 | 0.32 | 0.23 | 0.34 | 0.24 | 0.39 | 0.28 | 0.36 | 0.25 |  |  |
|  | Prefers gestures | 0.39 | 0.29 | 0.33 | 0.24 | 0.33 | 0.24 | 0.43 | 0.29 | 0.34 | 0.21 |  |  |
|  | Pronouncing certain sounds | 0.37 | 0.34 | 0.31 | 0.29 | 0.33 | 0.26 | 0.41 | 0.35 | 0.35 | 0.26 |  |  |
| 69m | Stumbles on words | 0.43 | 0.32 | 0.36 | 0.27 | 0.36 | 0.28 | 0.50 | 0.40 | 0.35 | 0.23 |  |  |
|  | Prefers gestures | 0.41 | 0.30 | 0.34 | 0.24 | 0.35 | 0.26 | 0.43 | 0.30 | 0.38 | 0.23 |  |  |
|  | Pronouncing certain sounds | 0.46 | 0.41 | 0.40 | 0.35 | 0.41 | 0.34 | 0.52 | 0.48 | 0.46 | 0.37 |  |  |
| 81m | Stumbles on words | 0.40 | 0.30 | 0.31 | 0.24 | 0.34 | 0.27 | 0.47 | 0.38 | 0.29 | 0.19 | 0.23 | 0.23 |
|  | Prefers gestures | 0.38 | 0.28 | 0.30 | 0.21 | 0.30 | 0.22 | 0.39 | 0.28 | 0.30 | 0.17 | 0.21 | 0.21 |
|  | Pronouncing certain sounds | 0.43 | 0.38 | 0.35 | 0.31 | 0.36 | 0.30 | 0.49 | 0.44 | 0.42 | 0.33 | 0.22 | 0.21 |
| 38m | EAS – Sociability | 0.38 | 0.30 | 0.33 | 0.27 | 0.38 | 0.31 | 0.37 | 0.25 | 0.38 | 0.26 |  |  |
|  | Stays mainly silent | 0.30 | 0.26 | 0.23 | 0.20 | 0.18 | 0.15 | 0.31 | 0.23 | 0.22 | 0.15 |  |  |
|  | Avoids eye contact | 0.21 | 0.16 | 0.16 | 0.12 | 0.16 | 0.09 | 0.26 | 0.17 | 0.19 | 0.10 |  |  |
| 57m | EAS – Sociability | 0.49 | 0.38 | 0.43 | 0.36 | 0.46 | 0.38 | 0.49 | 0.32 | 0.49 | 0.35 |  |  |
|  | Stays mainly silent | 0.36 | 0.32 | 0.29 | 0.27 | 0.27 | 0.23 | 0.33 | 0.28 | 0.36 | 0.30 |  |  |
|  | Avoids eye contact | 0.29 | 0.23 | 0.23 | 0.18 | 0.22 | 0.15 | 0.35 | 0.27 | 0.27 | 0.18 |  |  |
| 69m | EAS – Sociability | 0.47 | 0.37 | 0.41 | 0.34 | 0.44 | 0.35 | 0.49 | 0.33 | 0.45 | 0.31 | 0.12 | 0.13 |
|  | Stays mainly silent | 0.37 | 0.34 | 0.29 | 0.27 | 0.31 | 0.29 | 0.39 | 0.35 | 0.36 | 0.30 |  |  |
|  | Avoids eye contact | 0.35 | 0.26 | 0.27 | 0.21 | 0.25 | 0.16 | 0.42 | 0.26 | 0.29 | 0.19 |  |  |
| 81m | Stays mainly silent | 0.33 | 0.29 | 0.26 | 0.23 | 0.28 | 0.24 | 0.34 | 0.27 | 0.34 | 0.31 | 0.16 | 0.18 |
|  | Avoids eye contact | 0.34 | 0.26 | 0.26 | 0.20 | 0.26 | 0.19 | 0.38 | 0.25 | 0.30 | 0.21 | 0.22 | 0.25 |
| 91m | DAWBA – Social fears | 0.20 | 0.16 | 0.13 | 0.10 | 0.16 | 0.12 | 0.24 | 0.17 | 0.18 | 0.11 | 0.18 | 0.21 |
|  | Total communalities | 42.7 | 36.1 | 36.0 | 29.9 | 34.4 | 27.3 | 43.4 | 34.4 | 32.6 | 24.5 | 18.9 | 19.5 |
|  | N | 13138 | | 7811 | | 2481 | | 1816 | | 1863 | | 13138 | |

The ‘maximum’ communalities were estimated by the R2 from linear regression analyses of each variable on the remaining 92 variables. The estimated communalities were derived from factor analyses retaining 7 factors. Estimated communalities exceeded the ‘maximum’ for the *Single* data set.

The number of observations for the factor analysis of pairwise correlations varied between 5201 and 11316 with an average of 7811.

Data sets:

Standard The main data set used in this study based upon imputed data derived from 93 variables.

Imputed Imputation based upon 93 variables, gender, family adversity (during pregnancy, first 2 years after birth, 3rd and 4th years), parenting score (6m). Results not shown being very similar to standard data set.

Pairwise Loadings derived from pairwise correlations

Complete Only observed data for all 93 variables (N=2481)

Low IQ Analysis restricted to bottom quartile of FSIQ (N=1816)

High IQ Analysis restricted to top quartile of FSIQ (N=1863)

Single Standard data set but restricted to 44 variables excluding repeat measures
